# Supplementary material for: Nuclear pre-mRNA 3′-end processing regulates synapse and axon development in C. elegans
Source: Oxford University Press journal article supplement (doi:10.1242/dev.049692), 2010-06-08
Supplement: dev049692tables1.pdf [file dev049692tables1.pdf]

**Table S1. List of primers**

| Gene           | Primer        | Sequence                          | Purpose                                                            |                                  |
|----------------|---------------|-----------------------------------|--------------------------------------------------------------------|----------------------------------|
| <i>ama-1</i>   | YJ5268        | TGCATGGCTCATACGAGAAG              | Controls for RT-PCR to test transcript levels                      |                                  |
|                | YJ5269        | TGGAAGAAGAATTCGATGG               | "                                                                  |                                  |
| <i>lin-15A</i> | WW14          | ATGCCCTAGCGATGAAGTT               | RT-PCR to test transcript levels                                   |                                  |
|                | WW15          | CATTGGAGTTTGCTCTCTTT              | "                                                                  |                                  |
| <i>pfs-2</i>   | YJ5258        | TCCCTGCAGATTCAACTCCT              | <i>ju608</i> mutation detection; RT-PCR to test transcript levels  |                                  |
|                | YJ5259        | TCGCGATCAGACCTTTTGT               | "                                                                  |                                  |
|                | YJ5260        | GCCGGACACATTTATTCTCG              | RNAi clone                                                         |                                  |
|                | YJ5266        | TTGCCATCCTCCTTGATTTC              | "                                                                  |                                  |
|                | YJ5262        | CGAGCGCTGGATTTAAAGTTTGTGG         | Full-length amplification for transgenes                           |                                  |
|                | YJ5267        | CTTGTTCTCTTTGCTCGAGATGAC          | "                                                                  |                                  |
|                | YJ5415        | CAGGAAGGCCAAATGCCGC               | <i>pfs-2</i> GFP                                                   |                                  |
|                | YJ5416        | TTATTATAGAGTCGAATCAGTTGTCATCATGTT | "                                                                  |                                  |
|                | <i>sydn-1</i> | YJ3166                            | GACCCTTCTGGCAAATCG                                                 | <i>ju541</i> deletion genotyping |
|                |               | YJ3167                            | GGATTCTCTAATTCATTGATTTCC                                           | "                                |
| YJ3175         |               | ATCAGTTGAGACACAGAGCGG             | Full-length transgenic rescue                                      |                                  |
| YJ3728         |               | ACAGCAATATAGAGACAGCCAGG           | "                                                                  |                                  |
| YJ4563         |               | CGCTACGAGACCCATCTTG               | PCR for cDNA determination                                         |                                  |
| YJ4566         |               | TTGCCATCCTCCTTGATTTC              | "                                                                  |                                  |
| YJ3169         |               | CAGGGGATGTTGACAAGC                | RT-PCR to test transcript levels; <i>ju541</i> deletion genotyping |                                  |
| YJ3176         |               | GATAGACGGATTCTGATTCGG             | RT-PCR to test transcript levels                                   |                                  |
| YJ5422         |               | TTATCGGATCAAATGGAGCTG             | "                                                                  |                                  |
| YJ5423         |               | TGCTGATATAACCCTGCTG               | "                                                                  |                                  |
| YJ5270         |               | GGCTCCGTATCAGACCAGG               | "                                                                  |                                  |
| YJ5271         |               | TAAGGAGGTGGCTGAATTGG              | "                                                                  |                                  |
| SP1            |               | YJ4041                            | GATAACTACCACCATCAGAATCG                                            | 5' RACE <i>sydn-1</i>            |
| SP2            |               | YJ4040                            | TTCTCGTAGCCCAGCGTC                                                 | "                                |
| SP3            |               | YJ4039                            | ATTTGTCGCAGTCAATGGC                                                | "                                |
| SP5            | YJ4171        | ATGGCTCCGTATCAGACCAGC             | 3' RACE <i>sydn-1</i>                                              |                                  |
