# Supplementary figures and images for: Nuclear pre-mRNA 3′-end processing regulates synapse and axon development in C. elegans
Source: Oxford University Press journal article supplement (doi:10.1242/dev.049692), 2010-06-08

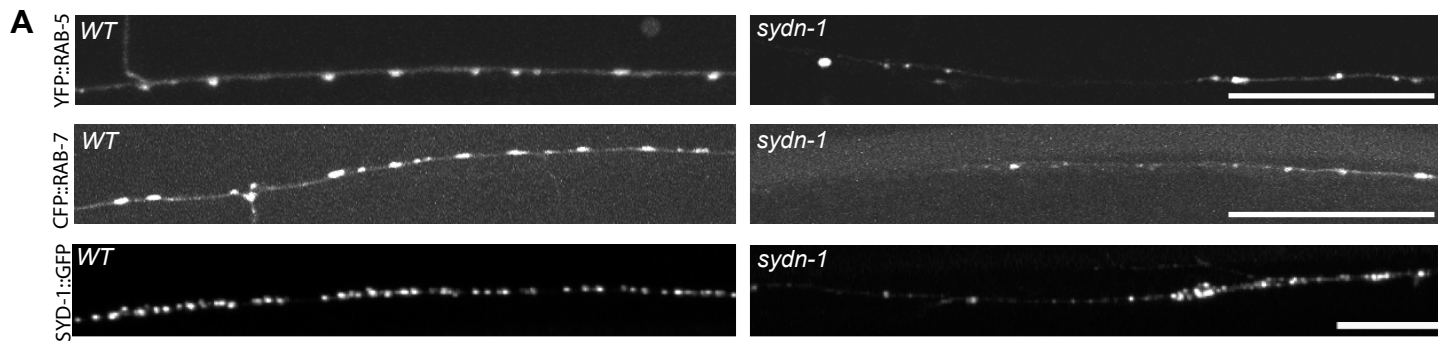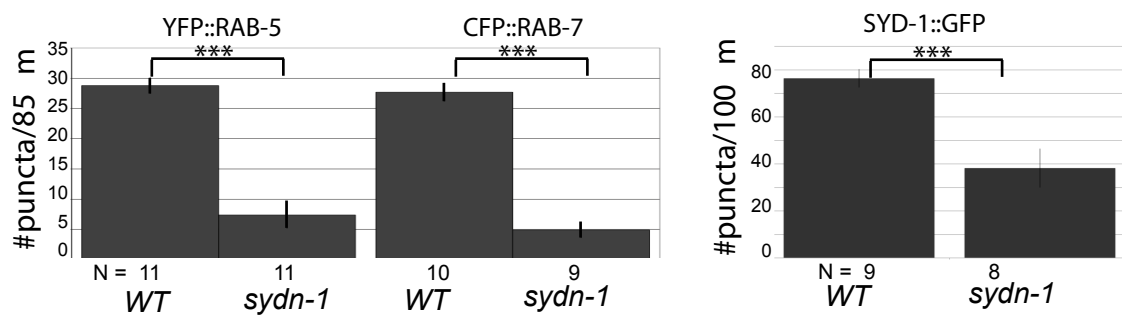

**B L1**

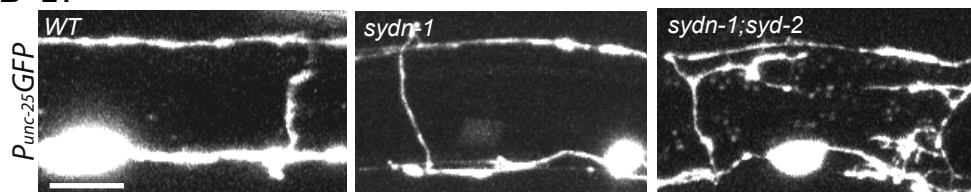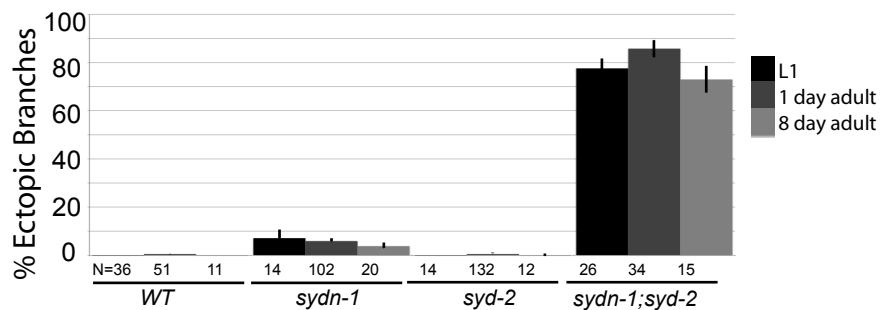

Supplement: dev049692-sup-049692figs1.pdf [file dev049692-sup-049692figs1.pdf]

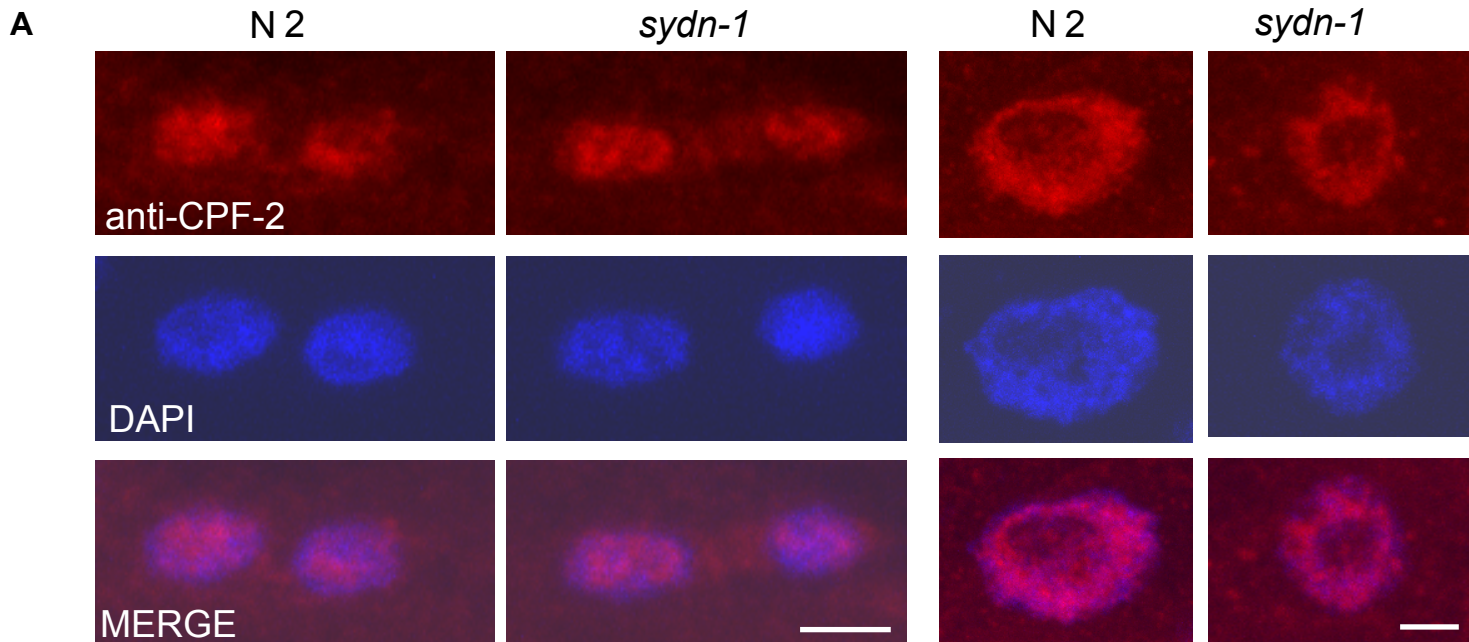

**B**

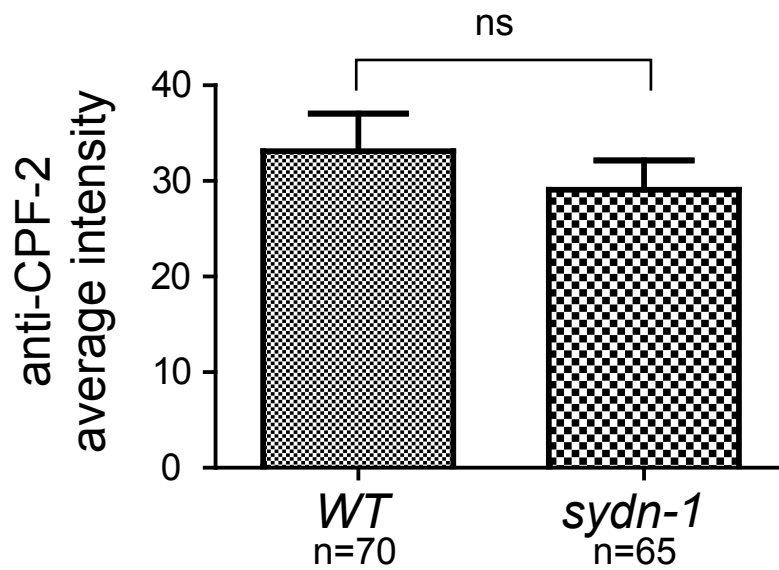

Supplement: dev049692-sup-049692figs4.pdf [file dev049692-sup-049692figs4.pdf]
